# Supplementary material for: The significance of macrophage phenotype in cancer and biomaterials
Source: PubMed Central journal article supplement (PMC4884036; doi:10.1186/s40169-014-0041-2), 2014-11-25
Supplement: 40169_2014_41_MOESM5_ESM.pdf [file 40169_2014_41_MOESM5_ESM.pdf]

**Table 1.** Advantages and disadvantages of anti-cancer therapies targeting macrophage behaviors.

| <b>Approach</b>          | <b>Advantages</b>                                                                                  | <b>Disadvantages</b>                                                              |
|--------------------------|----------------------------------------------------------------------------------------------------|-----------------------------------------------------------------------------------|
| Anti-angiogenic therapy  | Inhibit tumor growth and prevent metastasis [137, 138], improves efficacy of chemotherapeutics[33] | Must be used in combination with chemotherapeutics[34]; systemic effects[34, 139] |
| Recruitment inhibition   | Prevent macrophages from entering tumor, becoming TAMs[140, 141]                                   | Systemic effects[140]                                                             |
| Macrophage reprogramming | Macrophages secrete tumoricidal molecules [52, 142]                                                | Local delivery necessary to avoid altering systemic Th1/Th2 paradigm[143]         |
