# Supplementary material for: The significance of macrophage phenotype in cancer and biomaterials
Source: PubMed Central journal article supplement (PMC4884036; doi:10.1186/s40169-014-0041-2), 2014-11-25
Supplement: 40169_2014_41_MOESM6_ESM.pdf [file 40169_2014_41_MOESM6_ESM.pdf]

**Table 2.** Biomaterial influence on macrophage phenotype.

| <b>Biomaterial Property</b>                                   | <b>Macrophage Response</b>                                                            |
|---------------------------------------------------------------|---------------------------------------------------------------------------------------|
| Large fibers and pores (PDO)                                  | M2 response, wound healing, angiogenesis [112]                                        |
| Fiber size                                                    |                                                                                       |
| ~0.6 $\mu\text{m}$ (PLLA)                                     | Minimal M1 activation, low FBGC population [110]                                      |
| ~1.6 $\mu\text{m}$ (PLLA)                                     | High FBGC population [110]                                                            |
| Hydrogels with pores (30-40 $\mu\text{m}$ )<br>(pHEMA-co-MAA) | M2 dominated, maximum vascularization, minimum fibrotic response [120]                |
| Microgel coating (pNIPAm-co-PEGDA)                            | Reduction of M1 activation and cytokine secretion [113]                               |
| Zwitterionic hydrogels                                        | Anti-inflammatory, pro-healing M2 macrophages, angiogenesis, no fibrous capsule [114] |
| Subintestinal submucosa                                       |                                                                                       |
| Crosslinked with carbodiimide                                 | M1 bias, chronic inflammation, prolonged healing [24]                                 |
| Non-crosslinked                                               | M2 bias, constructive remodeling [24]                                                 |
| Acetylated chitosan                                           |                                                                                       |
| 5% acetylated                                                 | Predominately M2, reduced fibrous capsule [111, 122]                                  |
| 15% acetylated                                                | Presence of M1 macrophages [111, 122]                                                 |
| Glutaraldehyde crosslinked collagen                           | M1/M2 balance, improved vascularization [123]                                         |
| Biologically-derived scaffolds                                |                                                                                       |
| Porcine submucosa, urinary bladder                            | M2, timely constructive tissue remodeling [23]                                        |
| Human, porcine dermis                                         | M1, prolonged healing [23]                                                            |
